# Supplementary material
Source: publisher site journal article supplement (https://studysites.uk.sagepub.com/gribben/Web%20Material%20(Appendix)/Gribben_Web%20Material%20Table%207.1.pdf)
Supplement: Supplementary file 1 [file Gribben_Web%20Material%20Table%207.1.pdf]

Table 7.1 The 10-Step assignment checklist

|    | <b>Assignment submission date:</b> / /       | <b>Deadline date</b> | ✓ |
|----|----------------------------------------------|----------------------|---|
| 1  | Set up your assignment folder                | / /                  |   |
| 2  | Analyse your assignment question             | / /                  |   |
| 3  | Resource, read, annotate and sort your notes | / /                  |   |
| 4  | Critically think – keep and discard          | / /                  |   |
| 5  | Plan your assignment structure               | / /                  |   |
| 6  | Write your first draft                       | / /                  |   |
| 7  | Write your second draft – use Turnitin       | / /                  |   |
| 8  | Do final edit                                | / /                  |   |
| 9  | Do final referencing check                   | / /                  |   |
| 10 | Do final proofread                           | / /                  |   |
